# Supplementary material
Source: Springer Nature journal article supplement (https://mijn.bsl.nl/resource/supplementary/13047_2008_88_MOESM5_ESM.pdf/7109596)
Supplement: MOESM5 [file 7109596]

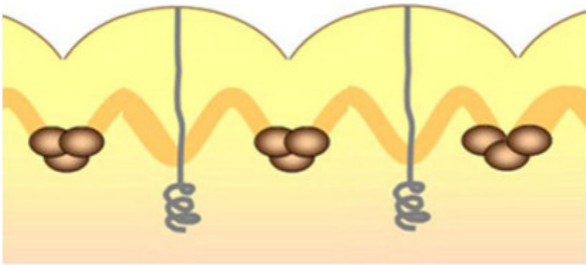

Benign melanocytic naevus: melanocytes are frequently clustered in the areas below the furrows of the plantar dermatoglyphics

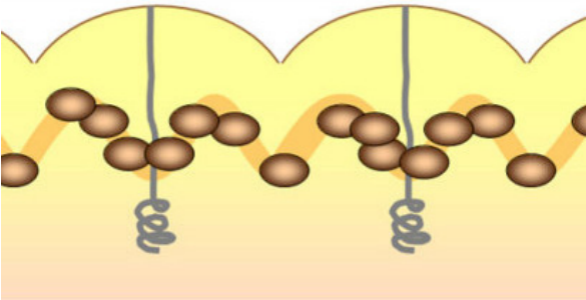

Malignant melanoma: melanocytes and pigmentation extends and is accentuated onto the dermatoglyphic ridges of the plantar skin
